# Supplementary material for: Single-cell analysis reveals clonally expanded tumor-associated CD57+ CD8 T cells are enriched in the periphery of patients with metastatic urothelial cancer responding to PD-L1 blockade
Source: PubMed Central journal article supplement — J Immunother Cancer. 2022 Aug 18;10(8):e004759. doi: 10.1136/jitc-2022-004759 (PMC9394212; doi:10.1136/jitc-2022-004759), 2022-08-18
Supplement: jitc-2022-004759supp002.pdf [file jitc-2022-004759supp002.pdf]

| Characteristic                               | Discovery cohort       |                       | Validation cohort      |                         |                         |                   |
|----------------------------------------------|------------------------|-----------------------|------------------------|-------------------------|-------------------------|-------------------|
|                                              | Atezolizumab treatment |                       | Atezolizumab treatment |                         | Chemotherapy treatment  |                   |
|                                              | R (11)                 | NR (9)                | R (15)                 | NR (15)                 | R (20)                  | NR (20)           |
| Age (years)<br>Mean (Std. Deviation)         | 69.3 (+/-8.1)          | 61.8 (+/- 7.3)        | 71.9 (+/-12.1)         | 65.7 (+/9.1)            | 66.1 (+/-10.8)          | 64.0 (+/-9.7)     |
| Sex, number (%)                              |                        |                       |                        |                         |                         |                   |
| male                                         | 9 (82)                 | 7 (78)                | 11 (73)                | 10 (67)                 | 19 (95)                 | 17 (85)           |
| female                                       | 2 (18)                 | 2 (22)                | 4 (27)                 | 5 (33)                  | 1 (5)                   | 3 (15)            |
| Race, number (%)                             |                        |                       |                        |                         |                         |                   |
| white                                        | 11 (100)               | 9 (100)               | 13 (86.6)              | 12 (80)                 | 14 (70)                 | 16 (80)           |
| Asian                                        | 0 (0)                  | 0 (0)                 | 0 (0)                  | 2 (13)                  | 2 (10)                  | 3 (15)            |
| other                                        | 0 (0)                  | 0 (0)                 | 1 (6.7)                | 1 (7)                   | 0                       | 0                 |
| unknown                                      | 0 (0)                  | 0 (0)                 | 1 (6.7)                |                         | 4 (20)                  | 1 (5)             |
| LDH (u/L)<br>Median<br>(interquartile range) | 198<br>(181, 225)      | 278<br>(169.5, 430.5) | 204<br>(163, 379)      | 267.5<br>(176.3, 301.8) | 183.5<br>(161.3, 227.8) | 182<br>(151, 342) |
| Liver metastases, number (%)                 | 3 (27)                 | 4 (44)                | 0 (0)                  | 7 (47)                  | NA                      | NA                |
| ECOG score, number                           |                        |                       |                        |                         |                         |                   |
| 0                                            | 4                      | 4                     | 6                      | 3                       | NA                      | NA                |
| 1                                            | 7                      | 5                     | 7                      | 12                      | NA                      | NA                |
| 2                                            | 0                      | 0                     | 2                      | 0                       | NA                      | NA                |
