# Supplementary material for: Single-cell analysis reveals clonally expanded tumor-associated CD57 + CD8 T cells are enriched in the periphery of patients with metastatic urothelial cancer responding to PD-L1 blockade
Source: HighWire-hosted journal article supplement (doi:10.1136/jitc-2022-004759), 2022-08-01
Supplement: jitc-2022-004759supp005_data_supplement.xlsx [file jitc-2022-004759supp005_data_supplement.xlsx]

## Sheet: Sheet1
Antibody	Clone	Provider
CD45	Hi30	Fluidigm
CD14	TUK4	Invitrogen
CD19	HIB19	Biolegend
CD57	HCD57	Biolegend
CD56	NCAM16.2	BD
HLA-DR	L243	Biolegend
TIGIT	MAB7898	R&D
CD69	FN50	Biolegend
CD3	UCHT1	Biolegend
CD8	SK1	Biolegend
CD4	SK3	Biolegend
CD45RO	UCHL1	Biolegend
CX3CR1	KO124E1	Biolegend
KLRG1	13F2F12	eBioscience
CD27	LG.7F9	Biolegend
ICOS	C398.4A	Biolegend
CD103	B-Ly7	Biolegend
TCRgt-PE	5A6.E9	Invitrogen
Anti-PE	PE001	Biolegend
CD3	UCTH1	Biolegend
PD-1	eBioJ105	eBioscience
CD38	HIT2	Biolegend
CD71	CY1G4	Biolegend
CD161	HP-3G10	Biolegend
CD127	AO19D5	Biolegend
TIM-3	344823	R&D
CCR7	150503	R&D
CD25	M-A251	Biolegend
CD1244	C1.7	Biolegend
CD28	CD28.2	Biolegend
CD39	A1	Biolegend
CD16	3g8	Fluidigm
Perforin	B-D48	Abcam
